# Supplementary material
Source: PubMed Central journal article supplement (PMC3916134)
Supplement: NIHMS527098-supplement-Supp_Data.pdf [file NIHMS527098-supplement-Supp_Data.pdf]

Supplementary Information for:

Hypothesis Driven Single Nucleotide Polymorphism Search (HyDn-SNP-S)

Rebecca J Swett<sup>a</sup>, Angela Elias<sup>a</sup>, Jeffrey A Miller<sup>b</sup>, Gregory E Dyson<sup>c</sup>, G. Andrés Cisneros<sup>a,\*</sup>

<sup>a</sup>Department of Chemistry, Wayne State University, 5101 Cass Ave. Detroit, MI, 48202.

<sup>b</sup>Department of Computer Science, Eastern Michigan University, Ypsilanti, MI, USA 48197.  
<sup>c</sup>Karmanos Cancer Institute, Wayne State University, Detroit, MI, 48203.

Table 1: Statistical results from applying HyDn SNPs to four cancer phenotypes

| Breast cancer           |       |         |          | Prostate cancer |       |         |          | Lung cancer |       |         |          | Melanoma cancer |       |         |               |
|-------------------------|-------|---------|----------|-----------------|-------|---------|----------|-------------|-------|---------|----------|-----------------|-------|---------|---------------|
| Genotypic genetic model |       |         |          |                 |       |         |          |             |       |         |          |                 |       |         |               |
| SNP                     | Gene  | p.value | Location | SNP             | Gene  | p.value | Location | SNP         | Gene  | p.value | Location | SNP             | Gene  | p.value | Location      |
| rs1292504               | POLD3 | 0.006   | 5' UTR   | rs10898995      | POLD3 | 0.045   | 5' UTR   | rs675450    | POLD3 | 0.002   | 5' UTR   | rs2908280       | POLD2 | 0.021   | intron        |
| rs524051                | POLN  | 0.047   | intron   | rs2351000       | POLG  | 0.024   | intron   | rs1787091   | POLD3 | 0.024   | 5' UTR   | rs1945132       | POLD3 | 0.022   | 3' UTR        |
| rs3218651               | POLQ  | 0.023   | H1201R   | rs3218651       | POLQ  | 0.018   | H1201R   | rs645541    | POLD3 | 0.019   | 5' UTR   | rs1638566       | POLD4 | 0.003   | intron        |
|                         |       |         |          |                 |       |         |          | rs676537    | POLD3 | 0.016   | 5' UTR   | rs2514258       | POLD4 | 0.005   | intron        |
|                         |       |         |          |                 |       |         |          | rs10793091  | POLD3 | 0.013   | 5' UTR   | rs7951732       | POLD4 | 0.013   | intron        |
|                         |       |         |          |                 |       |         |          | rs10793092  | POLD3 | 0.007   | 5' UTR   | rs1790735       | POLD4 | 0.002   | intron        |
|                         |       |         |          |                 |       |         |          | rs1433972   | POLD3 | 0.031   | 5' UTR   | rs41549716      | POLG  | 0.02    | Y831C         |
|                         |       |         |          |                 |       |         |          | rs7113533   | POLD3 | 0.031   | 5' UTR   | rs3135056       | POLN  | 0.039   | intron        |
|                         |       |         |          |                 |       |         |          | rs7943085   | POLD3 | 0.016   | intron   | rs1745335       | POLN  | 0.029   | intron        |
|                         |       |         |          |                 |       |         |          | rs10793095  | POLD3 | 0.002   | 3' UTR   | rs487848        | POLQ  | 0.006   | A581V         |
|                         |       |         |          |                 |       |         |          | rs3176175   | POLG  | 0.013   | intron   | rs532411        | POLQ  | 0.005   | A2304V        |
|                         |       |         |          |                 |       |         |          | rs758130    | POLG  | 0       | intron   | rs3218634       | POLQ  | 0.004   | L2538V/L2538F |
|                         |       |         |          |                 |       |         |          | rs6793252   | POLQ  | 0.019   | intron   | rs702019        | POLQ  | 0.045   | intron        |
|                         |       |         |          |                 |       |         |          |             |       |         |          |                 |       |         |               |
| Recessive genetic model |       |         |          |                 |       |         |          |             |       |         |          |                 |       |         |               |
| SNP                     | Gene  | p.value | Location | SNP             | Gene  | p.value | Location | SNP         | Gene  | p.value | Location | SNP             | Gene  | p.value | Location      |
| rs7113533               | POLD3 | 0.05    | 5' UTR   | rs10898995      | POLD3 | 0.022   | 5' UTR   | rs675450    | POLD3 | 0.008   | 5' UTR   | rs2908280       | POLD2 | 0.007   | intron        |
| rs7932922               | POLD3 | 0.038   | 3' UTR   | rs1292504       | POLD3 | 0.03    | 5' UTR   | rs663016    | POLD3 | 0.041   | 5' UTR   | rs2887046       | POLD3 | 0.028   | no data       |
| rs9328764               | POLN  | 0.023   | R425C    | rs1638566       | POLD4 | 0.033   | intron   | rs674306    | POLD3 | 0.041   | 5' UTR   | rs1945132       | POLD3 | 0.022   | no data       |
| rs6830513               | POLN  | 0.021   | T378T    | rs8305          | POLI  | 0.044   | A731T    | rs10793091  | POLD3 | 0.007   | 5' UTR   | rs1638566       | POLD4 | 0.017   | intron        |
| rs10011549              | POLN  | 0.036   | G336S    | rs3218651       | POLQ  | 0.02    | H1201R   | rs1433972   | POLD3 | 0.008   | 5' UTR   | rs2514258       | POLD4 | 0.023   | intron        |
| rs10018786              | POLN  | 0.033   | M310L    |                 |       |         |          | rs7943085   | POLD3 | 0.019   | intron   | rs7951732       | POLD4 | 0.013   | intron        |
| rs3117813               | POLN  | 0.041   | intron   |                 |       |         |          | rs10793095  | POLD3 | 0.004   | 3' UTR   | rs1790735       | POLD4 | 0.025   | intron        |
| rs3117816               | POLN  | 0.035   | intron   |                 |       |         |          | rs6592579   | POLD3 | 0.041   | 3' UTR   | rs41549716      | POLG  | 0.02    | Y831C         |

|           |      |       |        |  |  |  |  |            |       |       |        |           |      |       |        |
|-----------|------|-------|--------|--|--|--|--|------------|-------|-------|--------|-----------|------|-------|--------|
| rs3117819 | POLN | 0.042 | intron |  |  |  |  | rs10219168 | POLD3 | 0.041 | 3' UTR | rs6941583 | POLH | 0.041 | M647L  |
| rs524051  | POLN | 0.015 | intron |  |  |  |  | rs3176175  | POLG  | 0.013 | intron | rs6899628 | POLH | 0.039 | 3-UTR  |
| rs1745335 | POLN | 0.049 | intron |  |  |  |  | rs758130   | POLG  | 0.008 | intron | rs3734690 | POLH | 0.028 | T478T  |
| rs529966  | POLN | 0.042 | intron |  |  |  |  | rs6793252  | POLQ  | 0.019 | intron | rs4640970 | POLM | 0.045 | intron |
| rs618262  | POLN | 0.034 | intron |  |  |  |  |            |       |       |        | rs3135056 | POLN | 0.025 | intron |
| rs7659386 | POLN | 0.029 | intron |  |  |  |  |            |       |       |        | rs6800901 | POLQ | 0.018 | intron |
| rs3218651 | POLQ | 0.006 | H1201R |  |  |  |  |            |       |       |        | rs5744990 | POLE | 0.036 | L1903L |

Additive genetic model

| SNP        | Gene  | p.value | Location |
|------------|-------|---------|----------|------------|-------|---------|----------|------------|-------|---------|----------|------------|-------|---------|----------|
| rs7113533  | POLD3 | 0.023   | 5' UTR   | rs2075070  | POLD2 | 0.037   | intron   | rs10793091 | POLD3 | 0.028   | 5' UTR   | rs1945132  | POLD3 | 0.022   | intron   |
| rs9328764  | POLN  | 0.018   | R425C    | rs10898995 | POLD3 | 0.014   | 5' UTR   | rs10793092 | POLD3 | 0.007   | 5' UTR   | rs7951732  | POLD4 | 0.013   | intron   |
| rs6830513  | POLN  | 0.016   | T378T    | rs1292504  | POLD3 | 0.035   | 5' UTR   | rs1433972  | POLD3 | 0.008   | 5' UTR   | rs41549716 | POLG  | 0.02    | Y831C    |
| rs10011549 | POLN  | 0.027   | G336S    | rs1638566  | POLD4 | 0.044   | intron   | rs7943085  | POLD3 | 0.004   | intron   | rs6941583  | POLH  | 0.045   | M647L    |
| rs10018786 | POLN  | 0.026   | M310L    | rs2351000  | POLG  | 0.033   | intron   | rs6592581  | POLD3 | 0.024   | 3' UTR   | rs6899628  | POLH  | 0.043   | 3-UTR    |
| rs3117813  | POLN  | 0.041   | intron   |            |       |         |          | rs3176175  | POLG  | 0.013   | intron   | rs3734690  | POLH  | 0.031   | T478T    |
| rs1923775  | POLN  | 0.019   | intron   |            |       |         |          | rs6793252  | POLQ  | 0.019   | intron   | rs3135056  | POLN  | 0.046   | intron   |
| rs524051   | POLN  | 0.025   | intron   |            |       |         |          | rs574316   | POLN  | 0.041   | intron   | rs6800901  | POLQ  | 0.037   | intron   |
| rs1745335  | POLN  | 0.038   | intron   |            |       |         |          |            |       |         |          | rs702019   | POLQ  | 0.018   | intron   |
| rs529966   | POLN  | 0.032   | intron   |            |       |         |          |            |       |         |          | rs5744990  | POLE  | 0.031   | L1903L   |
| rs618262   | POLN  | 0.027   | intron   |            |       |         |          |            |       |         |          |            |       |         |          |
| rs7659386  | POLN  | 0.022   | intron   |            |       |         |          |            |       |         |          |            |       |         |          |
| rs6599418  | POLN  | 0.046   | intron   |            |       |         |          |            |       |         |          |            |       |         |          |
| rs3218651  | POLQ  | 0.007   | H1201R   |            |       |         |          |            |       |         |          |            |       |         |          |
| rs3730463  | POLL  | 0.047   | T221P    |            |       |         |          |            |       |         |          |            |       |         |          |

Dominant genetic model

| SNP       | Gene  | p.value |        | SNP       | Gene  | p.value |        | SNP        | Gene  | p.value |        | SNP        | Gene  | p.value |        |
|-----------|-------|---------|--------|-----------|-------|---------|--------|------------|-------|---------|--------|------------|-------|---------|--------|
| rs1292504 | POLD3 | 0.002   | 5' UTR | rs1673041 | POLD1 | 0.029   | intron | rs675450   | POLD3 | 0.019   | 5' UTR | rs1638566  | POLD4 | 0.049   | intron |
| rs3730814 | POLI  | 0.037   | intron | rs2075070 | POLD2 | 0.042   | intron | rs1787091  | POLD3 | 0.019   | 5' UTR | rs2514258  | POLD4 | 0.049   | intron |
| rs1923775 | POLN  | 0.049   | intron | rs3824999 | POLD3 | 0.018   | intron | rs645541   | POLD3 | 0.008   | 5' UTR | rs1790735  | POLD4 | 0.012   | 5' UTR |
| rs3821367 | POLQ  | 0.018   | intron | rs2351000 | POLG  | 0.014   | intron | rs663555   | POLD3 | 0.041   | 5' UTR | rs3218784  | POLI  | 0.041   | I261M  |
| rs3911713 | POLQ  | 0.047   | intron | rs1427463 | POLG2 | 0.018   | A169T  | rs676537   | POLD3 | 0.019   | 5' UTR | rs9328764  | POLN  | 0.03    | R425C  |
|           |       |         |        | rs607877  | POLI  | 0.032   | intron | rs10793092 | POLD3 | 0.002   | 5' UTR | rs6830513  | POLN  | 0.03    | T378T  |
|           |       |         |        |           |       |         |        | rs7113533  | POLD3 | 0.041   | 5' UTR | rs10011549 | POLN  | 0.03    | G336S  |
|           |       |         |        |           |       |         |        | rs7943085  | POLD3 | 0.041   | intron | rs10018786 | POLN  | 0.03    | M310L  |

|  |  |  |  |  |  |  |            |       |       |        |           |      |       |              |
|--|--|--|--|--|--|--|------------|-------|-------|--------|-----------|------|-------|--------------|
|  |  |  |  |  |  |  | rs10793095 | POLD3 | 0.041 | 3' UTR | rs2022302 | POLN | 0.03  | H441H        |
|  |  |  |  |  |  |  | rs758130   | POLG  | 0     | intron | rs1745335 | POLN | 0.009 | intron       |
|  |  |  |  |  |  |  |            |       |       |        | rs487848  | POLQ | 0.008 | A581V        |
|  |  |  |  |  |  |  |            |       |       |        | rs532411  | POLQ | 0.008 | A2304V       |
|  |  |  |  |  |  |  |            |       |       |        | rs3218634 | POLQ | 0.008 | L2538V/L2538 |
|  |  |  |  |  |  |  |            |       |       |        | rs702019  | POLQ | 0.035 | intron       |

Figure S1: Correlation plots from the four Polymerase Lambda simulations, these original correlation plots were used to generate the difference plots shown in Figure 4.

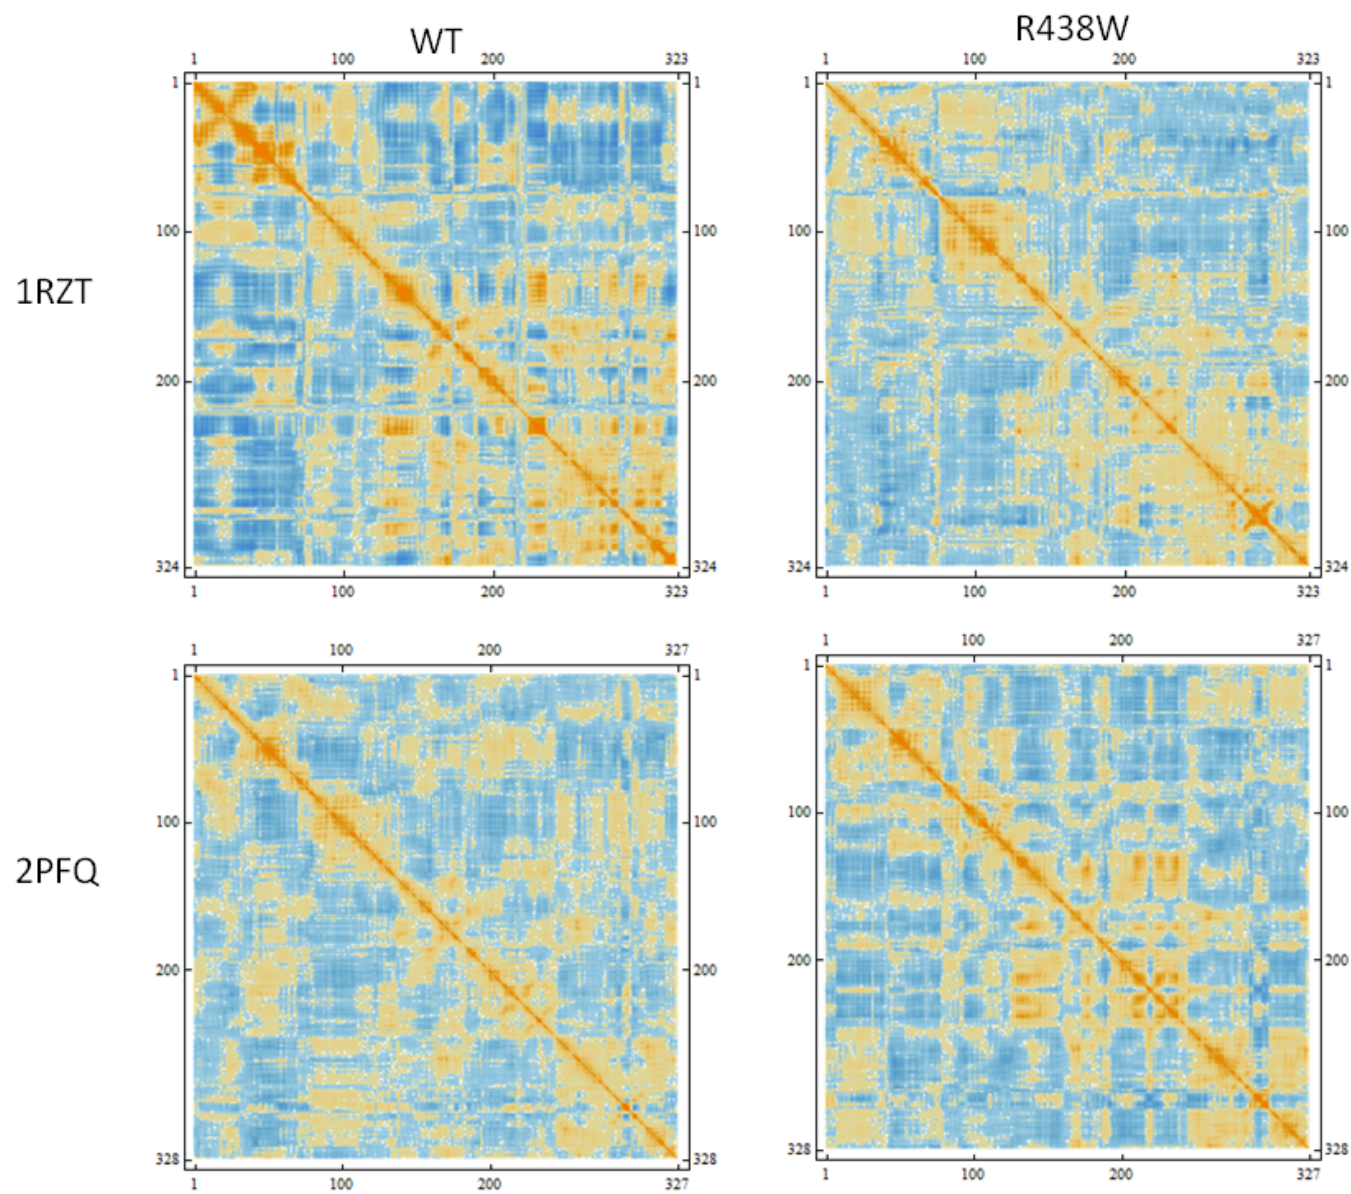

Movie S1: An animation of a mathematical interpolation between the binary and ternary conformations is shown, Loop 1 is colored purple, and the site of mutation R438 is shown in red and labeled. Within the conformational space available to Loop 1 visualized by this interpolation, the mutation is between 12Å and 14Å away.
